# Supplementary material for: Wastewater-induced microplastic biofouling in freshwater: role of particle size and flow velocity
Source: Royal Society of Chemistry journal article supplement (doi:10.1039/d4va00303a), 2024-11-28
Supplement: d4va00303a1.pdf [file d4va00303a1.pdf]

## Wastewater-induced Microplastic Biofouling in Freshwater: Role of Particle Size and Flow Rate

Gaurav Bhardwaj<sup>1</sup>, Malihe Mohammadiun<sup>1</sup>, Carlos Saul Osorio Gonzalez<sup>1</sup>, Satinder Kaur Brar<sup>1</sup>, Shooka Karimpour<sup>1\*</sup>

<sup>1</sup>Department of Civil Engineering, Lassonde School of Engineering, York University, North York, Toronto, M3J 1P3, Ontario, Canada

\*Corresponding Author: Shooka.karimpour@lassonde.yorku.ca

### 1. Synthetic Water Preparation

Table S1: Preparation of Synthetic Hard Reconstituted Water (1 L)

| Step             | Component                                                         | Quantity  | Notes                                           |
|------------------|-------------------------------------------------------------------|-----------|-------------------------------------------------|
| Initial Solution | Deionized Water                                                   | 900 mL    | Added to a cleaned Glass Bottle.                |
|                  | Magnesium Sulphate (MgSO <sub>4</sub> )                           | 120 mg    |                                                 |
|                  | Sodium Bicarbonate (NaHCO <sub>3</sub> )                          | 192 mg    |                                                 |
|                  | Potassium Chloride (KCl)                                          | 80 mg     |                                                 |
|                  |                                                                   |           | Aerate overnight to ensure complete dissolution |
| Calcium Solution | Calcium Sulphate Dihydrate (CaSO <sub>4</sub> ·2H <sub>2</sub> O) | 120 mg    | Dissolved in 100 mL deionized water             |
| Combination      | Combined Solutions                                                | 1 L total | Mix thoroughly to obtain homogeneous solution   |

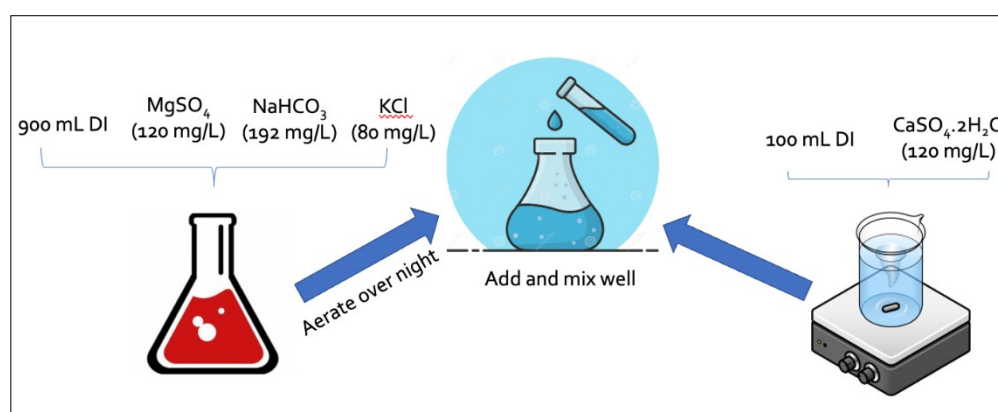

Figure S1: The preparation process of 1 L synthetic water based on the USEPA 2002 method.

Table S2: Nutrient Composition for Microbial Growth

| Nutrient Source              | Compound                                                                 | Concentration | Purpose                                                                       | References   |
|------------------------------|--------------------------------------------------------------------------|---------------|-------------------------------------------------------------------------------|--------------|
| Carbon Source                | Glucose (C <sub>6</sub> H <sub>12</sub> O <sub>6</sub> )                 | 1000 mg/L     | Provides carbon for microbial growth                                          | <sup>1</sup> |
| Nitrogen Source              | Ammonium Chloride (NH <sub>4</sub> Cl)                                   | 100 mg/L      | Supplies ammonium ions (NH <sub>4</sub> <sup>+</sup> )                        |              |
| Phosphorus Source            | Diammonium Phosphate ((NH <sub>4</sub> ) <sub>2</sub> HPO <sub>4</sub> ) | 10 mg/L       | Provides phosphate ions (PO <sub>4</sub> <sup>3-</sup> ) for microbial growth | <sup>2</sup> |
| C/N/P Ratio                  | 100/10/1                                                                 | -             | Balances growth and inhibits excessive EPS production                         | <sup>3</sup> |
| Natural Organic Matter (NOM) | Suwannee River NOM                                                       | 2 mg/L        | Introduces complex organic compounds                                          | <sup>4</sup> |

NOM: Natural Organic Matter; EPS: Extracellular Polymeric substances

## 2. Microplastics Characteristics

PE microbeads of two distinct sizes—small (180-200 μm) and larger (3-4 mm)—were purchased from Cospheric LLC (Somis, CA, USA). The microbeads were selected based on their high purity and availability in the desired size ranges.

### 2.1. Microscopic Characteristics

#### 2.1.1. Optical microscopy

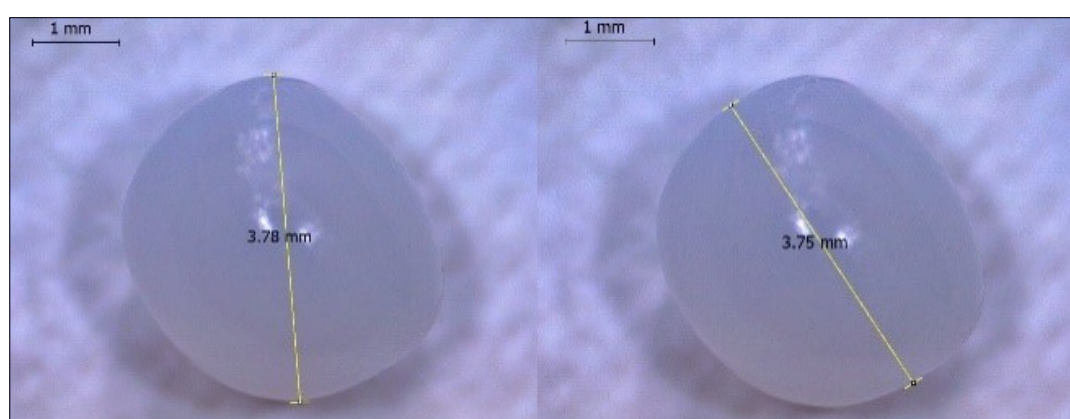

Figure S2: Optical microscopic images of polyethylene microbead (3-4mm), showing size distribution.

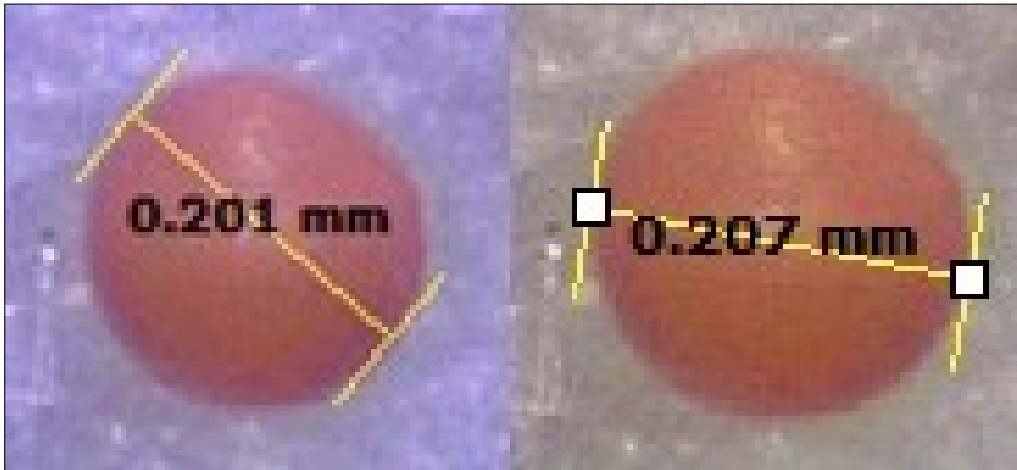

Figure S3: Optical microscopic images of polyethylene microbead (180-200  $\mu\text{m}$ ), showing size distribution.

### 2.1.2. Scanning Electron Microscopy

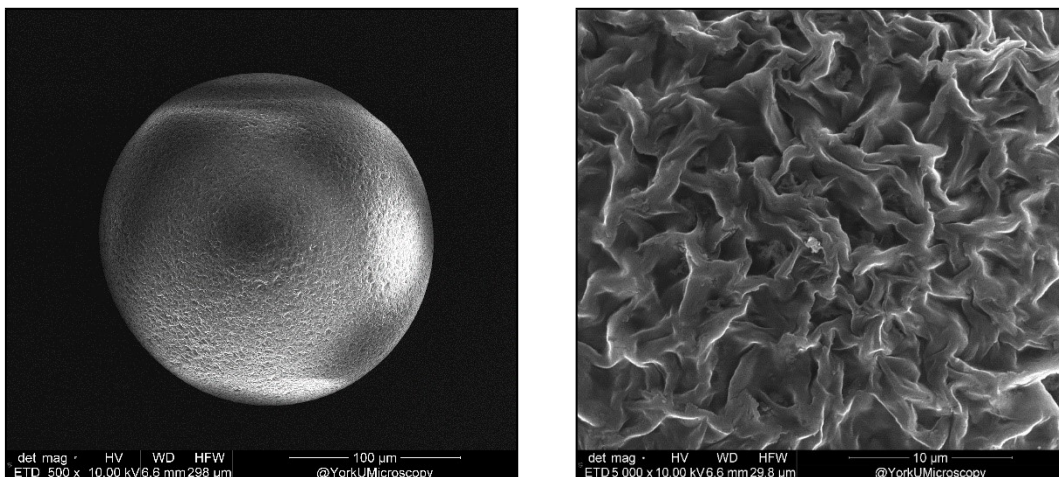

Figure S4: SEM images of polyethylene microbead (180-200  $\mu\text{m}$ ), showing size distribution and surface morphology.

## 2.2. Spectroscopic Characteristics

The Fourier Transform Infrared (FTIR) spectra of the polyethylene (PE) microbeads confirm their high purity and chemical stability. Key absorption peaks characteristic of PE, including the  $\text{CH}_2$  asymmetric stretching at  $2914\text{ cm}^{-1}$ ,  $\text{CH}_2$  symmetric stretching at  $2847\text{ cm}^{-1}$ , the

bending vibrations of CH<sub>2</sub> at 1472 cm<sup>-1</sup> and the rocking motions at 719 cm<sup>-1</sup>. These stable peak positions and intensities shows that the microbeads used in our experiments were of high purity PE.

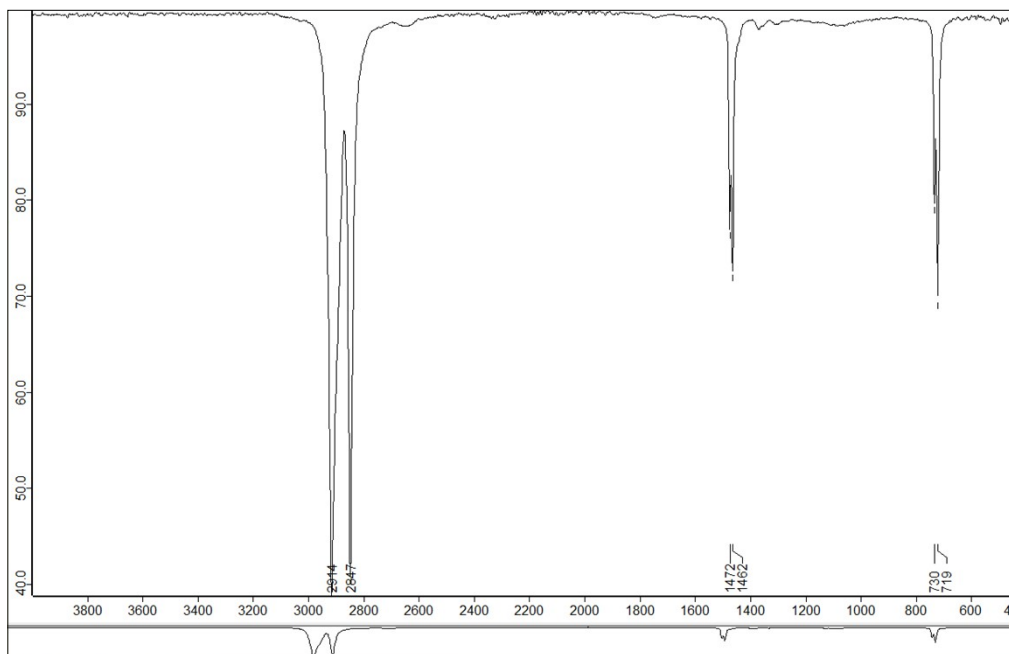

Figure S5: FTIR spectra for polyethylene microbead (180-200 μm).

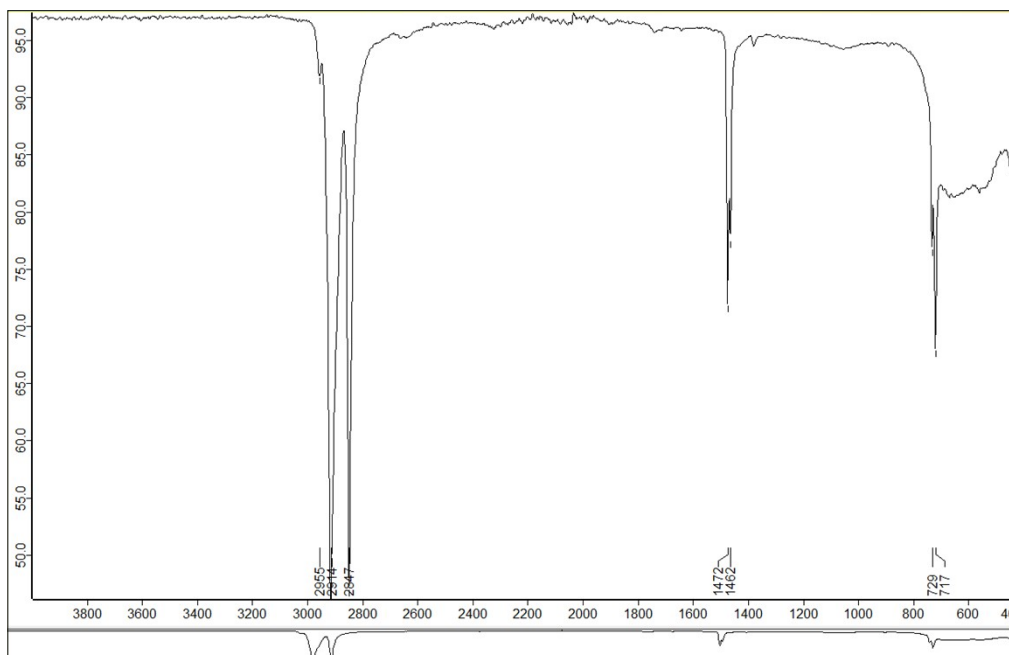

Figure S6: Figure S5: FTIR spectra for polyethylene microbead (3-4mm).

### 3. Hydrodynamic calculations

Given the cylindrical flow channel dimensions:

Diameter = 0.076 m; Height = 0.08 m

Cross-sectional area =  $\pi*(d/2)^2 = 3.14*(0.076/2)^2 = 0.004545 \text{ m}^2$

#### 3.1. Average Flow velocity (v):

$$(v) = Q/A$$

- 65 ml/min

$$\text{Flow velocity (v)} = Q/A = (6.5 \times 10^{-5} \text{ m}^3/\text{s}) / (0.004545 \text{ m}^2) = 0.238 \text{ m/s}$$

- 50 ml/min

$$\text{Flow velocity (v)} = Q/A = (5 \times 10^{-5} \text{ m}^3/\text{s}) / (0.004545 \text{ m}^2) = 0.11 \text{ m/s}$$

- 35 ml/min.

$$\text{Flow velocity (v)} = Q/A = (5 \times 10^{-5} \text{ m}^3/\text{s}) / (0.004545 \text{ m}^2) = 0.077 \text{ m/s}$$

The selected flow rates and corresponding average flow velocities were found to be within a range for mimicking typical outflow conditions in nearly stagnant freshwater bodies, such as lakes. Similar hydrodynamic conditions can be generated by wastewater treatment plant discharges, further validating the suitability of the chosen parameters for simulating such environments.

## References

- 1 M. T. Sturm, K. Schuhen and H. Horn, *Sci. Total Environ.*, 2022, **806**, 151388.
- 2 M. M. R. Khan, M. Ray, L. Ray and A. K. Guha, 2016.
- 3 I. Rahman, 2013.
- 4 W. Liu, S. A. Andrews, M. I. Stefan and J. R. Bolton, *Water Res.*, 2003, **37**, 3697–3703.
